# Supplementary material for: Code-Assisted Discovery of TAL Effector Targets in Bacterial Leaf Streak of Rice Reveals Contrast with Bacterial Blight and a Novel Susceptibility Gene
Source: PLOS journal article supplement (doi:10.1371/journal.ppat.1003972), 2014-02-27
Supplement: S3 (10.1371/journal.ppat.1003972.s003) [file journal.ppat.1003972.s003]

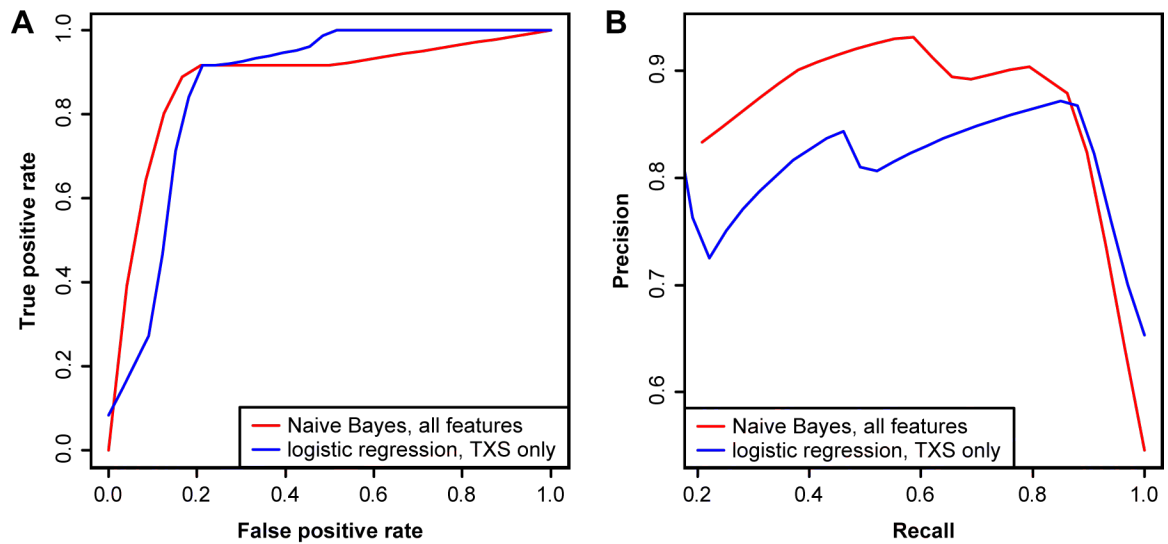

**Figure S3. Performance of a Naive Bayes classifiers trained on all EBE features or a logistic regression classifier trained on distance to transcriptional start site (TXS) using leave-one-out cross validation. (A) Receiver operating characteristic curve. (B) Precision and recall.**
