# Supplementary material for: Code-Assisted Discovery of TAL Effector Targets in Bacterial Leaf Streak of Rice Reveals Contrast with Bacterial Blight and a Novel Susceptibility Gene
Source: PLOS journal article supplement (doi:10.1371/journal.ppat.1003972), 2014-02-27
Supplement: S17 (10.1371/journal.ppat.1003972.s017) [file journal.ppat.1003972.s017]

**Text S1.** Supporting information for Materials and Methods.

**Nucleotide sequence of the modified 343 bp promoter fragment of *Bs3* (343Bs3) used to test TAL effector activity on different EBEs in the *Agrobacterium*-mediated transient expression-based reporter assay in *N. benthamiana*.** PCR primer sites for cloning the 343 bp promoter region of the *Bs3* gene (GenBank: EU078684) are highlighted in grey. The substitution of A for C to introduce an *Nco*I site (underlined) is shown in bold. The cognate effector-binding element (EBE) for *AvrBs3* is italicized.

**>343Bs3 promoter: Modified from *Capsicum annuum* cultivar ECW-30R, GenBank: EU078684**

```
TCATAGTCAAGCTAACGAAACTTATGCAAGGGAAATATGAAATTAGTATGCAAGTAAACTCAAAGAACTA
ATCATTGAACTGAAAAGATCAATATATCAAAAAAAAAAAAAAAAAACAATAAAACCGTTTAACCGATAGATTAA
CCATTTCTGGTTCAGTTTATGGGTAAACCACAATTTGCACACCAATGGTTAAACAATGAACACGTTTGCC
TGACCAATTTTATTATATAAACCTAACCATCCTCACAACTTCAAGTTATCATCCCCTTTCTCTTTTCTCC
TCTTGTCTTGTGCACCCGCTAAATCTATCAAAAACACAAGTAGTCCTAGTTGCACATATATTTTC
```

**Oligonucleotide duplex used to introduce the *Nco*I site into the 343Bs3 promoter by QuickChange mutagenesis (Agilent Technologies).**

```
5' - CCACAATTTGCACACCAATGGTTAAACAATGAAC -3'
5' - GTTCATTGTTTAAACCATTGGTGTGCAAATTGTGG -3'
```

**Oligonucleotide duplexes used to introduce Tal2g EBEs (underlined) into the 343Bs3 promoter at the *Nco*I site.**

**Tal2g EBE in LOC\_Os06g46500**

```
5' -CATGTAGCTGGCAAGTGACCTCAGCTCAGC-3'
3' -ATCGACCGTTCCTACTGGAGTCGAGTCGGTAC-5'
```

**Tal2g EBE in LOC\_Os01g52130**

```
5' -CATGAGAATGGCCCGTAGCCTCTCCTTGTT-3'
3' -TCTTACCGGGCATCGGAGAGGAACAAGTAC-5'
```

**Tal2g EBE in LOC\_Os06g13880**

```
5' -CATGGCTTTTCGCCAAAACCAAAGCTCAAG-3'
3' -CGAAAGCGGTTTTTGGTTTCGAGTTCGTAC-5'
```

**Tal2g EBE in LOC\_Os12g36920**

```
5' -CATGATAGTAGTTAAAATCCCCAGCTTTGG-3'
3' -TATCATCAATTTTAGGGTTCGAAACCGTAC-5'
```

**Tal2g EBE in LOC\_Os05g10650**

```
5' -CATGAGGGTAGCAACTATCGTCAACTAGAT-3'
3' -TCCCATCGTTGATAGCAGTTGATCTAGTAC-5'
```

**RVD sequences of dTALEs used in this study.**

dT434: HD NG HD NI NG HD NG HD NI NN NI NG HD HD HD NG NG NG

dT436: HD HD NI NI NI NI HD NN NG NI NI NG NG NG NI NN NI NI NG

dT437: HD NG NN NI NN HD NI HD NI HD NN HD NG NN HD NI HD NN NG NI NI NG
