# Supplementary material for: Code-Assisted Discovery of TAL Effector Targets in Bacterial Leaf Streak of Rice Reveals Contrast with Bacterial Blight and a Novel Susceptibility Gene
Source: PLoS Pathog. 2014 Feb 27;10(2):e1003972. doi: 10.1371/journal.ppat.1003972 (PMC3937315; doi:10.1371/journal.ppat.1003972)
Supplement: Table S3 — Rice (cv. Nipponbare) genes differentially expressed over time (q-Value ≤0.3) in response both to inoculation with Xanthomonas oryzae pv. oryzicola BLS256 Xoc) and X. oryzae pv. oryzae PXO99A (Xoo). (XLSX) [file ppat.1003972.s010.xlsx]

## Sheet: Table S3
Table S3. Rice (cv. Nipponbare) genes differentially expressed over time (q-Value ≤ 0.3) in response both to inoculation with Xanthomonas oryzae pv. oryzicola BLS256 (Xoc) and X. oryzae pv. oryzae PXO99A (Xoo).
Probe set ID	q			FC 2-96hd		FC from mock at 96he		Expressionf				Locus ID	Gene Product
	(Xoc vs. Xoo)a	(Xoo vs. Mock)b	(Xoc vs. Mock)c	Xoc	Xoo	Xoc	Xoo	Xoc 24h	Xoo 24h	Xoc 96h	Xoo 96h
Os.56119.1.S1_at	0.0425576	0.071	4.1e-07	1.72184	1.01164	4.92858	2.98832	6.53672	6.24444	7.06815	6.34631	LOC_Os02g15290	VQ domain containing protein, putative, expressed
Os.31171.1.S1_at	0.0880741	0.00015	3.4e-08	34.2276	19.4972	20.0711	10.3499	8.14584	6.46724	9.53712	8.58162	LOC_Os01g40290	expressed protein
Os.49794.1.S1_at	0.549608	2.5e-05	0.013	2.94662	4.97465	2.26868	4.30222	6.20942	6.49697	6.10482	7.02805	LOC_Os07g06970	HEN1, putative, expressed
Os.30258.1.S1_at	0.972972	0.031	3.3e-05	3.84559	2.78706	4.02224	2.81922	5.56635	5.15739	6.5844	6.0717	LOC_Os01g58240	OsSub6 - Putative Subtilisin homologue, expressed
Os.53217.1.S1_x_at	0.999997	0.09	0.068	1.25895	1.47121	2.82618	2.81853	5.81577	5.4091	6.08419	6.08029	LOC_Os03g03034	flavonol synthase/flavanone 3-hydroxylase, putative, expressed
Os.10510.1.S1_at	0.999997	0.13	0.011	1.49487	1.08507	3.11363	2.4437	6.73739	6.13685	7.21925	6.86972	LOC_Os03g03034	flavonol synthase/flavanone 3-hydroxylase, putative, expressed
a Calculated for the comparison of transcript abundance in Xoc vs. Xoo inoculated leaves across all time points.
b Calculated for the comparison of transcript abundance in Xoo vs. mock inoculated leaves across all time points.
c Calculated for the comparison of transcript abundance in Xoc vs. mock inoculated leaves across all time points.
d Fold change in transcript abundance in leaves at 96h relative to 2h after inoculation with the indicated strain.
e Fold change in transcript abundance in leaves at 96h relative to 96h after mock inoculation.
f Normalized expression value (average of all replicates) for leaves harvested 24h or 96h (as indicated) after inoculation with the indicated strain.
