# Supplementary material for: Code-Assisted Discovery of TAL Effector Targets in Bacterial Leaf Streak of Rice Reveals Contrast with Bacterial Blight and a Novel Susceptibility Gene
Source: PLoS Pathog. 2014 Feb 27;10(2):e1003972. doi: 10.1371/journal.ppat.1003972 (PMC3937315; doi:10.1371/journal.ppat.1003972)
Supplement: Table S9 — Primers used for RT-PCR amplification of selected rice gene transcripts. (XLSX) [file ppat.1003972.s016.xlsx]

## Sheet: Table S9
Table S9. Primers used for RT-PCR amplification of selected rice gene transcripts.
Locus IDa	Strandb	Sequence (5’ to 3’)
Actin (04g57210)	Fwd	AAACTTTGTTACGTCGCGGC
	Rev	CAAAATTCACGTCCGTACATCG
01g13610	Fwd	CCGTCTCTGGGAGAAGAAGTCC
	Rev	GCAACTAAAAACACCAACACCC
01g27210	Fwd	GCCGATGAGCAGCAACTATATA
	Rev	TGTTGGAGAAGTGGCTGAGGT
01g31220	Fwd	AAGTGTTGATTGGGGGAAGCT
	Rev	TATGACATCTGAGTGTAGCCA
01g40290	Fwd	GCGATCCATAGAAACAAAATAATA
	Rev	CAATCGATCACTCAATGGATAAATA
01g41240	Fwd	AGATGCTCCGGATACTCGACG
	Rev	CTTATAGCCGTCGTTGACCG
01g51040	Fwd	CTCTTCAGTTTGGGATGATCAT
	Rev	TCTCAGGAGTTGTTTGGAGCA
01g52130	Fwd	CTTCAAGTACACCCCGCTGGT
	Rev	GTTACCTCTAGCCTCGGATTC
01g53220c	Fwd	GAAGACGTTCCACATGGTGA
	Rev	TTGGCGAGGAACGCCATCAT
	Fwd2	GCACCGCAACTTCGCCAGCT
	Rev2	CTTGCAGGGATCGGACCCGT
01g57066	Fwd	TAATCTGGATATTTGGTCACATTCC
	Rev	GTTAATGAAGCCCGTATATTTGC
01g58240	Fwd	AGGAGTGCCTCGGAAGATTGC
	Rev	ACCCTGGACCCAGGTTATGC
02g08010	Fwd	GAGCAGCTCTCAAAAATCAAAAG
	Rev	CTAGTTGGCTAGGGATGAGTGTG
02g14770	Fwd	GAACACTCGTTTGGAGAGGAA
	Rev	AGTTTACCTGAAGGAGTAGCT
02g15290	Fwd	ATACGGTGGTTTTCCATGCTG
	Rev	ATGTTGGTGCCCACTGAAATTA
02g15710c	Fwd	CTGCTGCTGGCGCTTTGCT
	Rev	TGGCCGTGACCGCGACCT
02g16940	Fwd	GGGAAGCTCTACCAACTCAACC
	Rev	CTGCTACCGGAATCCTCACC
02g34970	Fwd	GCTTCCGCATCGGTACAATC
	Rev	GAACCGCAGCTCGATTCGAA
02g43760	Fwd	GCGCAGTTCTGCGACGTCTA
	Rev	GGTGATGAAGGGCCATGACAT
02g47660	Fwd	ATCCACGTCAGAGCCCGCC
	Rev	TGTACTGACTGAAACGGTGCA
03g03034	Fwd	GCAACGGAAGATACAAGAGCG
	Rev	TCCCAAACACCACCTACACCT
03g05370	Fwd	CCTGCCTCGAGTTTCAGCT
	Rev	GTGCTGATGCCATTGACGGA
03g07540	Fwd	ATGTCGAGCCGCCGTGGT
	Rev	TCTCGGCCTGCGGGCTGT
03g25490	Fwd	CCAGAATGGCAGGCAAGACT
	Rev	GACTTGGCTTCCAACATCGCA
03g37840	Fwd	TCCGGCAAGTGGAGCCCA
	Rev	GTTTCGCTACCACTTCACTCT
04g49194	Fwd	GAGGAGGACTACATCGAGAAGG
	Rev	AAATAAGTAAAGCATTGCCCG
04g55980	Fwd	GTTGTCGGCATAGCTCTGGT
	Rev	TGAAAAACACTGCAAAGCAAA
05g12450	Fwd	GACCAAGATACATCGAGTGGA
	Rev	ATGTGTGACTTGTGCGAGGAT
05g02200	Fwd	GCGGGCTGGCGAGGGAGACC
	Rev	GAGGCGTCGGCGCTCTGGC
05g27590	Fwd	CACGCGCGTACTGGGTCCA
	Rev	AGTACTACACGACGTACACGT
05g42150	Fwd	AAGGGCTCAACAGCGTGTACC
	Rev	GCTAGCAAATTCTCTCTCACACAGC
06g14750	Fwd	AAGGTTGGAGCGAGCTGTC
	Rev	CACAAGGCACAATAGGATCGA
06g37080	Fwd	GTGGTGATCGGCATCAATGG
	Rev	TGGGTGTAGATGCTCTCGTGG
06g39120	Fwd	CCGACTTCGATTTTCCCTTTCC
	Rev	CGCATAGTTACACGCTCACACC
06g46500	Fwd	ATGGAATCTGACGGCGAGTG
	Rev	GCCATACAAAGAATTCGCTGC
06g47950c	Fwd	TGCCTGAAGCCATGATTGGTT-3'
	Rev	CTGTGTATCATAGAATTGTCGGA
07g06970	Fwd	AGATTTGACATTGGCACTTGTCT
	Rev	CTCCCTACCACAAGAACTCAGTG
07g11510	Fwd	TGCTGGGAGGCATCTACAGG
	Rev	CACCACACATATGCTTCCAAAC
07g29750	Fwd	CGCAGCACCAGACCCTCT
	Rev	AAGCGGTCGAAGCGCGCGA
07g34510c	Fwd	TCTGGTGGAATCATGTATCTA
	Rev	CAGTGGTCTACTGCCATCA
07g36430	Fwd	CCTCGCTTGCTGCTCTTCT
	Rev	AACTTCCGGTCGAACGGGCT
07g47790	Fwd	GATGTGTGGCGGCGCGAT
	Rev	TGCCGAGCCAGACGCGC
08g26120	Fwd	AGATCCTTGCGAACAATGTCC
	Rev	CATGCCCTTGCTTTTGTGG
09g20220	Fwd	TCGGGCAGCGTTGCCGGATC
	Rev	TGTCCCTCCCCTTGCATCGTT
09g23560c	Fwd	CGGCGAGGGACACCTCT
	Rev	GACCATGACGTCGGAGAAG
	Fwd2	TGAAGGTGACGGTGATCAGC
	Rev2	GCGGCGGCAGCGTGCATT
	Fwd3	GCCGAGTGCCAGGCGAT
	Rev3	CCTTGCACGGTTACACACA
09g29100	Fwd	TCGACTACTTCCTCCGCGA
	Rev	GGCTGCATCATCTGCTAATCT
09g32100	Fwd	TCTGGGCCATCAGCATGA
	Rev	GACGCCGGCGAAGAAGAT
10g28240	Fwd	GCTGTGCCAGGTGTTCAACG
	Rev	CGTGATGATCTCGTGGAACG
10g38640	Fwd	AGGGGATGAAGCAACTGCTC
	Rev	AATAAAACATTCCGGCCTTTAC
11g01480	Fwd	CGTCCGCTCCAAGAACCCT
	Rev	GGATGGTTGCTGGTATTAGCT
12g01490	Fwd	AACTAGTGCAGGCAAGGAGGA
	Rev	GGAGCCAGTATGATCCATGG
12g42970	Fwd	GATGTGCACCCGCCGAAT
	Rev	CTCAGACGACAAGCATCGCA
PR1a (07g03710)	Fwd	GCGGGAAGTACGGCGAGA
	Rev	TCTCACCAGCATACGTACGTA
PR1b (01g28450)	Fwd	CCATGGCACTCCCCTCCCAA
	Rev	TAAGGCCTCTGTCCGACGAA
PAL (02g41630)	Fwd	TCGAGCACGCCCTCACCA
	Rev	TCTCCTCTCCTCCTCGATGA
EL2 (03g01740)	Fwd	TCGAGCACGCCCTCACCA
	Rev	TCTCCTCTCCTCCTCGATGA
a Per the Rice Genome Annotation Project, Release 7 (http://rice.plantbiology.msu.edu/). The prefix “LOC_Os” is omitted.
b Fwd, forward strand; Rev, reverse strand.
c Transcript not detected by RT-PCR, despite successful amplification of the gene by PCR using genomic DNA as template.
